# Supplementary material for: Sunlight-promoted photocatalytic hydrogen gas evolution from water-suspended cellulose: a systematic study
Source: Royal Society of Chemistry journal article supplement (doi:10.1039/c4pp00128a), 2014-07-01
Supplement: c4pp00128a1.pdf [file c4pp00128a1.pdf]

## SUPPLEMENTARY DATA - Photochemical & Photobiological Sciences

### Sunlight-promoted photocatalytic hydrogen gas evolution from water-suspended cellulose: systematic study

Andrea Speltini<sup>a,\*</sup>, Michela Sturini<sup>a,\*</sup>, Daniele Dondi<sup>a</sup>, Enrico Annovazzi<sup>a</sup>, Federica Maraschi<sup>a</sup>,  
Valentina Caratto<sup>b</sup>, Antonella Profumo<sup>a</sup>, Armando Buttafava<sup>a</sup>

<sup>a</sup>Department of Chemistry, University of Pavia, via Taramelli 12, 27100 Pavia, Italy

<sup>b</sup>Department of Chemistry and Industrial Chemistry, University of Genoa, via Dodecaneso 31, 16146  
Genova, Italy

\*Corresponding authors. Tel.: +39 0382-987347-9; fax: +39 0382-528544.

E-mail addresses: andrea.speltini@unipv.it (A. Speltini), michela.sturini@unipv.it (M. Sturini)

### LC-ESI-MS/MS identification of 5-hydroxymethylfurfural (HMF)

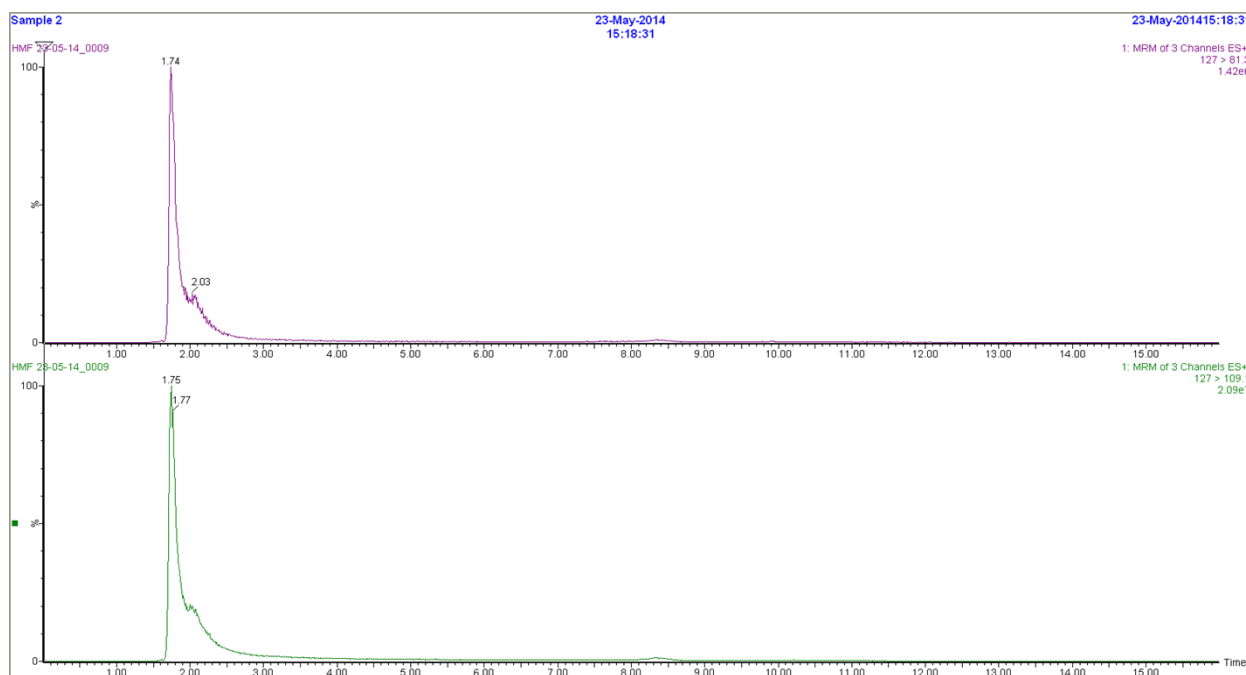

MRM chromatograms collected on the irradiated sample of water-suspended cellulose.

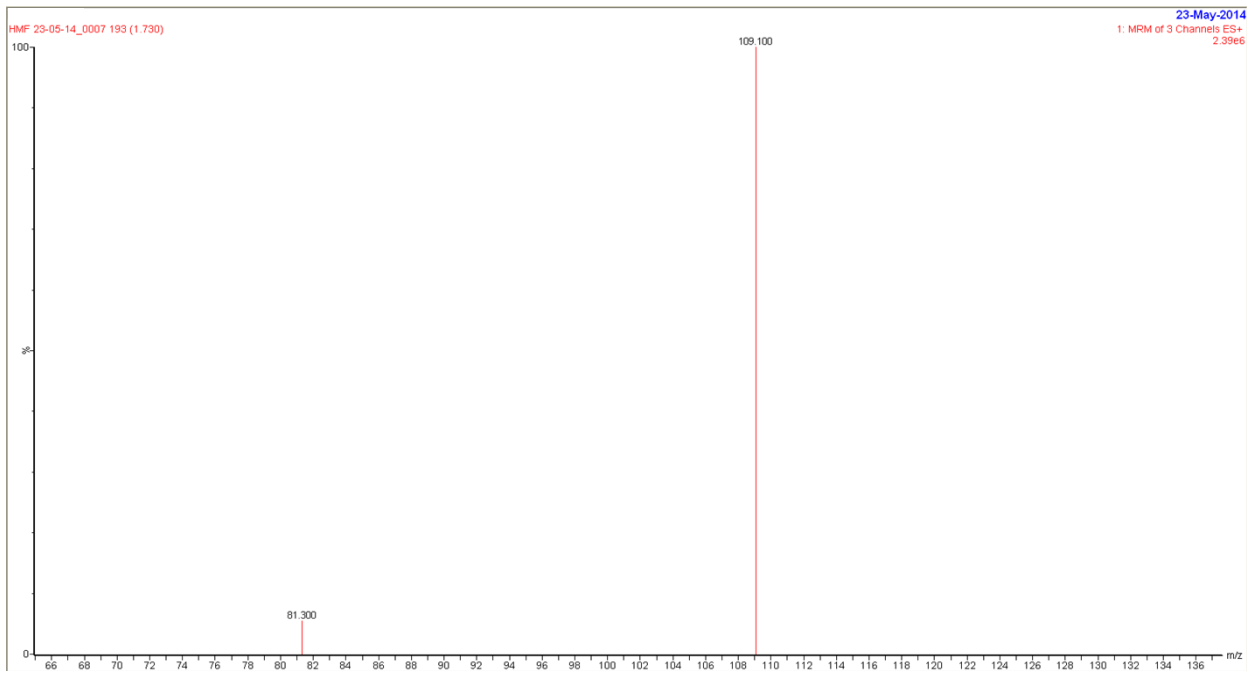

HMF fragmentation
